# Supplementary material
Source: Royal Society of Chemistry journal article supplement (doi:10.1039/d6ta02061e)
Supplement: d6ta02061e1.pdf [file d6ta02061e1.pdf]

# Supporting Information

## Ultrafast Plasmonic Hot-Hole Transfer Mediated Efficient Charge Separation in $\text{Cu}_{2-x}\text{S}/\text{CdZnS}$ Heterostructure

*Manvi Sachdeva<sup>‡</sup>, Nitika Kharbanda<sup>‡</sup>, Himanshu Bhatt<sup>§</sup>, Kaliyamoorthy Justice*

*Babu<sup>‡</sup>, and Hirendra N. Ghosh<sup>§, \*</sup>*

<sup>‡</sup>*Institute of Nano Science and Technology, Knowledge City, Sector 81, SAS Nagar, Punjab-  
140306, India.*

<sup>§</sup>*School of Chemical Sciences, National Institute of Science Education and Research  
(NISER), Bhubaneswar, Odisha 752050, India.*

*\* Email: [hngosh@niser.ac.in](mailto:hngosh@niser.ac.in), [hngosh2004@gmail.com](mailto:hngosh2004@gmail.com)*

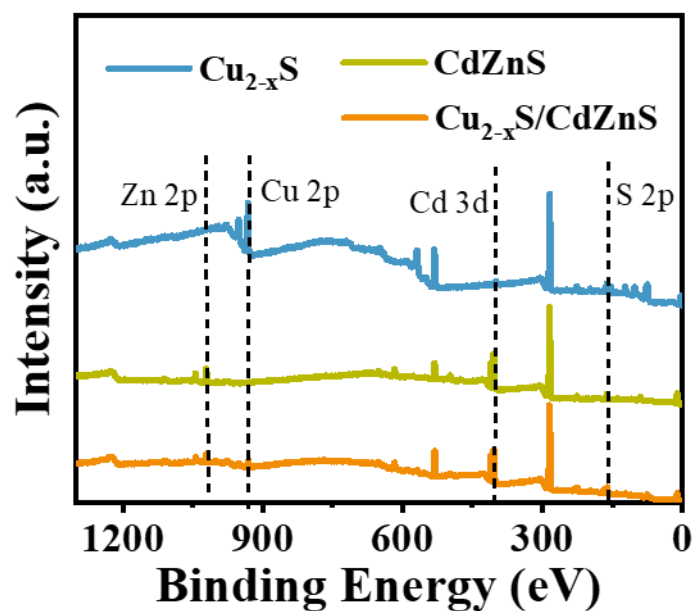

**Figure S1.** Full survey X-ray photoelectron spectroscopy (XPS) of  $\text{Cu}_{2-x}\text{S}$ , CdZnS and  $\text{Cu}_{2-x}\text{S}/\text{CdZnS}$ .

**Table S1.** Atomic percentage of  $\text{Cu}_{2-x}\text{S}$ , CdZnS and  $\text{Cu}_{2-x}\text{S}/\text{CdZnS}$  obtained from XPS analysis.

| Sample                                 | Copper | Sulphur | Cadmium | Zinc  |
|----------------------------------------|--------|---------|---------|-------|
| $\text{Cu}_{2-x}\text{S}$              | 54.84  | 45.16   | NA      | NA    |
| CdZnS                                  | NA     | 45.24   | 27.35   | 27.4  |
| $\text{Cu}_{2-x}\text{S}/\text{CdZnS}$ | 31.40  | 44.74   | 11.83   | 12.03 |

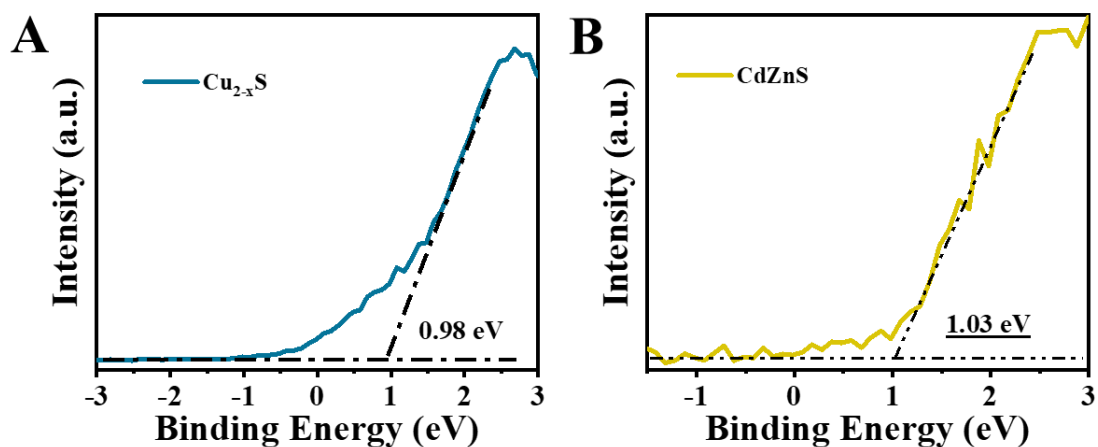

**Figure S2.** Determination of valence band positions for  $\text{Cu}_{2-x}\text{S}$  and  $\text{CdZnS}$  from the XPS valence band spectra.

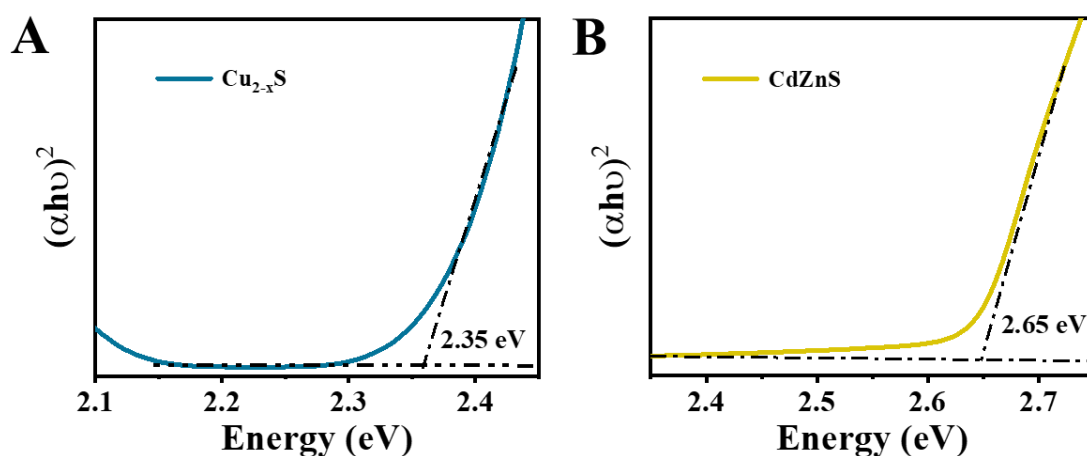

**Figure S3.** Band gap calculation for (A)  $\text{Cu}_{2-x}\text{S}$  and (B)  $\text{CdZnS}$  using Tauc's plot method.

**Table S2.** Atomic percentage of  $\text{Cu}_{2-x}\text{S}$ ,  $\text{Cu}_{2-x}\text{S}/\text{CdZnS}$  obtained from EDS.

| Sample                                 | Copper | Sulphur | Cadmium | Zinc |
|----------------------------------------|--------|---------|---------|------|
| $\text{Cu}_{2-x}\text{S}$              | 54.73  | 45.27   | NA      | NA   |
| $\text{Cu}_{2-x}\text{S}/\text{CdZnS}$ | 35.72  | 49.67   | 9.18    | 5.43 |

**Table S3.** Multiexponential fitting time constants for the bleach growth ( $\tau_{h-h}$ ) and recovery kinetics ( $\tau_{h-ph}$  and  $\tau_{ph-ph}$ ) of  $\text{Cu}_{2-x}\text{S}$  and  $\text{Cu}_{2-x}\text{S}/\text{CdZnS}$  at 800 nm excitation.

| Sample                                 | Pump (nm) | Probe (nm) | $\tau_{h-h}$ (fs)      | $\tau_{h-ph}$ (ps)        | $\tau_{ph-ph}$ (ps)   |
|----------------------------------------|-----------|------------|------------------------|---------------------------|-----------------------|
| $\text{Cu}_{2-x}\text{S}$              | 800       | 1180       | $141 \pm 6$<br>(+100%) | $0.69 \pm 0.02$<br>(-71%) | $135 \pm 7$<br>(-29%) |
| $\text{Cu}_{2-x}\text{S}/\text{CdZnS}$ | 800       | 1180       | IRF<br>(+100%)         | $0.63 \pm 0.01$<br>(-82%) | $60 \pm 4$<br>(-18%)  |

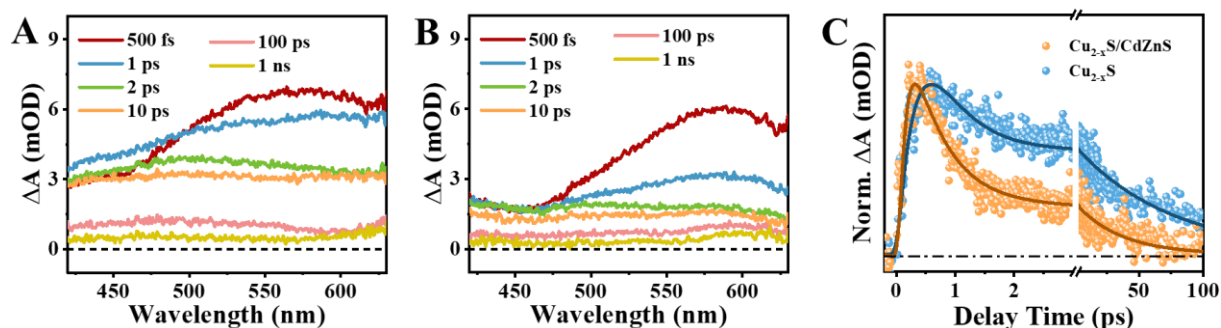

**Figure S4.** Ultrafast transient absorption (TA) spectra of (A)  $\text{Cu}_{2-x}\text{S}$ , (B)  $\text{Cu}_{2-x}\text{S}-\text{CdZnS}$  heterostructure span across visible region (415 nm - 680 nm) at different pump-probe delay times, (C) normalized comparative bleach dynamics between  $\text{Cu}_{2-x}\text{S}$  and  $\text{Cu}_{2-x}\text{S}-\text{CdZnS}$  probed at 500 nm upon 800 nm photoexcitation at fluence of  $400 \text{ uJcm}^{-2}$ .

**Table S4.** Multiexponential fitting time constants for  $\text{Cu}_{2-x}\text{S}$  and  $\text{Cu}_{2-x}\text{S}/\text{CdZnS}$  upon 800 nm excitation, probed at 550 nm.

| Sample                                 | Pump (nm) | Probe (nm) | growth (fs)    | Recovery $\tau_1$ (ps)    | Recovery $\tau_2$ (ps) |
|----------------------------------------|-----------|------------|----------------|---------------------------|------------------------|
| $\text{Cu}_{2-x}\text{S}$              | 800       | 550        | IRF<br>(+100%) | $1.22 \pm 0.1$<br>(-61%)  | $366 \pm 10$<br>(-39%) |
| $\text{Cu}_{2-x}\text{S}/\text{CdZnS}$ | 800       | 550        | IRF<br>(+100%) | $0.74 \pm 0.06$<br>(-84%) | $89 \pm 6$<br>(-16%)   |

**Table S5.** Multiexponential fitting time constants for  $\text{Cu}_{2-x}\text{S}$  and  $\text{Cu}_{2-x}\text{S}/\text{CdZnS}$  upon 800 nm excitation, probed at 500 nm.

| Sample                                 | Pump (nm) | Probe (nm) | growth (fs)   | Recovery $\tau_1$ (ps) | Recovery $\tau_2$ (ps) |
|----------------------------------------|-----------|------------|---------------|------------------------|------------------------|
| $\text{Cu}_{2-x}\text{S}$              | 800       | 500        | 0.192 (+100%) | $1.03 \pm 0.05$ (-39%) | $117 \pm 10$ (-61%)    |
| $\text{Cu}_{2-x}\text{S}/\text{CdZnS}$ | 800       | 500        | IRF (+100%)   | $0.97 \pm 0.05$ (-71%) | $60 \pm 5$ (-29%)      |

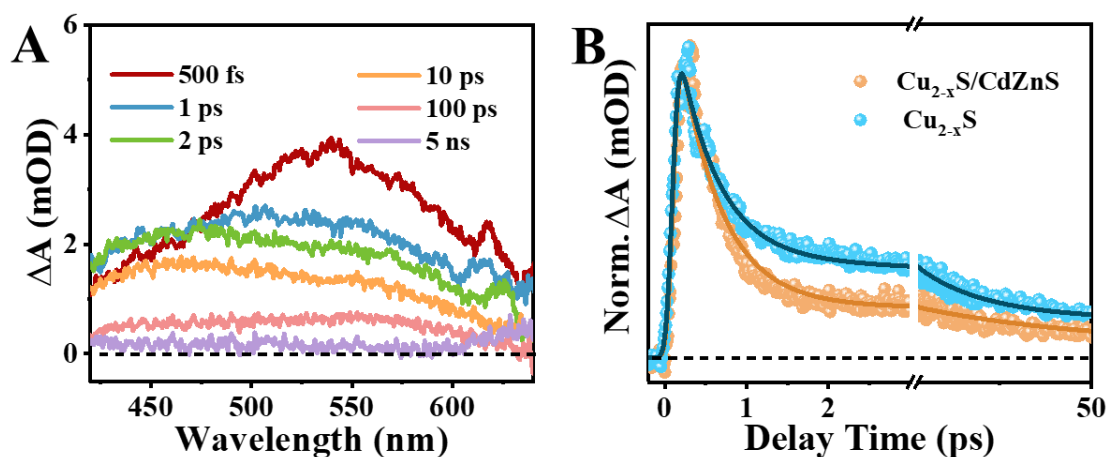

**Figure S5.** Ultrafast transient absorption (TA) spectra of (A)  $\text{Cu}_{2-x}\text{S}$ , span across visible region (415 nm - 680 nm) at different pump-probe delay times, (B) normalized comparative bleach dynamics between  $\text{Cu}_{2-x}\text{S}$  and  $\text{Cu}_{2-x}\text{S}/\text{CdZnS}$  probed at 550 nm upon 400 nm photoexcitation at fluence of  $200 \text{ uJcm}^{-2}$ .

**Table S6.** Multiexponential fitting time constants for the bleach growth ( $\tau_{\text{h-h}}$ ) and recovery kinetics ( $\tau_{\text{h-ph}}$  and  $\tau_{\text{ph-ph}}$ ) of  $\text{Cu}_{2-x}\text{S}$  and  $\text{Cu}_{2-x}\text{S}/\text{CdZnS}$  at 400 nm excitation.

| Sample                                 | Pump (nm) | Probe (nm) | $\tau_{\text{h-h}}$ (fs) | $\tau_{\text{h-ph}}$ (ps) | $\tau_{\text{ph-ph}}$ (ps) |
|----------------------------------------|-----------|------------|--------------------------|---------------------------|----------------------------|
| $\text{Cu}_{2-x}\text{S}$              | 400       | 1160       | $180 \pm 6$ (+100%)      | $0.74 \pm 0.02$ (-65%)    | $235 \pm 7$ (-35%)         |
| $\text{Cu}_{2-x}\text{S}/\text{CdZnS}$ | 400       | 1160       | $161 \pm 6$ (+100%)      | $0.68 \pm 0.03$ (-79%)    | $40 \pm 4$ (-21%)          |

**Table S7.** Multiexponential fitting time constants for  $\text{Cu}_{2-x}\text{S}$  and  $\text{Cu}_{2-x}\text{S}/\text{CdZnS}$  upon 800 nm excitation, probed at 550 nm.

| Sample                    | Pump (nm) | Probe (nm) | growth (fs)    | Recovery $\tau_1$ (ps) | Recovery $\tau_2$ (ps) |
|---------------------------|-----------|------------|----------------|------------------------|------------------------|
| Cu <sub>2-x</sub> S       | 400       | 550        | IRF<br>(-100%) | 0.99 ± 0.05<br>(-69%)  | 518 ± 38<br>(-31%)     |
| Cu <sub>2-x</sub> S/CdZnS | 400       | 550        | IRF<br>(-100%) | 0.92 ± 0.05<br>(-81%)  | 311 ± 10<br>(-16%)     |

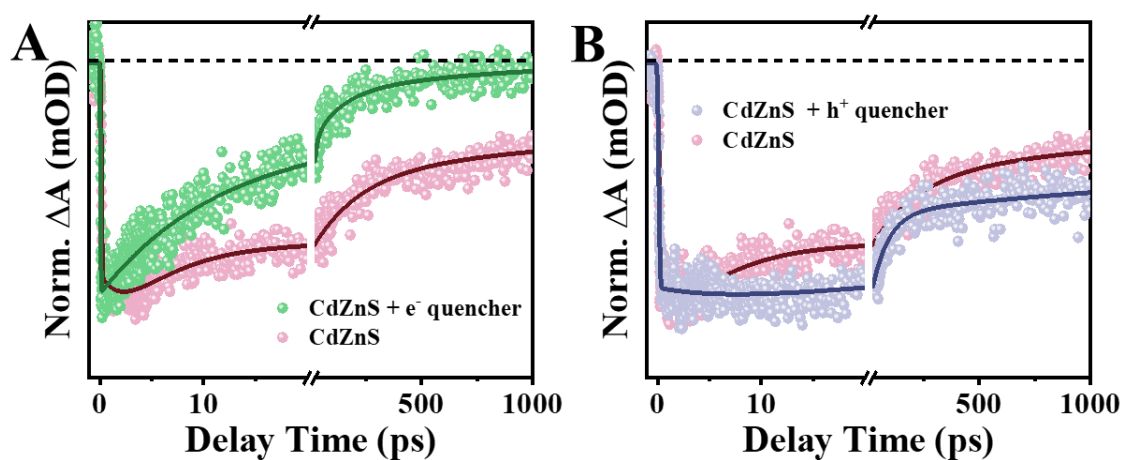

**Figure S6.** Comparative dynamics between bare CdZnS and in the presence of (A) electron quencher (BQ) and (D) hole scavenger (TEOA) upon 400 nm excitation.

**Table S8.** Multiexponential fitting time constants for CdZnS, Cu<sub>2-x</sub>S/CdZnS and in presence of electron (BQ) and hole quencher (TEOA) upon 400 nm excitation, probed at 450 nm (band edge bleach).

| Sample                                 | Pump (nm) | Probe (nm) | growth (fs)               |                        | Recovery $\tau_1$ (ps)    | Recovery $\tau_2$ (ps)   | Recovery $\tau_3$        |
|----------------------------------------|-----------|------------|---------------------------|------------------------|---------------------------|--------------------------|--------------------------|
| CdZnS                                  | 400       | 450        | 0.33<br>(-100%)           |                        | $64 \pm 4$<br>(-59%)      | $744 \pm 50$<br>(-25%)   | $> 1\text{ns}$<br>(-16%) |
| $\text{Cu}_{2-x}\text{S}/\text{CdZnS}$ | 400       | 450        | IRF<br>(-100%)            |                        | $12.25 \pm 0.5$<br>(-82%) | $479 \pm 40$<br>(-10%)   | $> 1\text{ns}$<br>(-8%)  |
| CdZnS + BQ                             | 400       | 450        | IRF<br>(-100%)            |                        | $19.4 \pm 0.9$<br>(-72%)  | $621 \pm 25$<br>(-28%)   | —                        |
| CdZnS + TEOA                           | 400       | 450        | $0.22 \pm 0.01$<br>(-96%) | $3.6 \pm 0.8$<br>(-4%) | $123 \pm 12$<br>(-44%)    | $> 1\text{ns}$<br>(-54%) | —                        |
